# Supplementary material for: Why vertically π-expanded imidazo[1,2-a]pyridines are weak fluorescence emitters: experimental and computational studies
Source: Royal Society of Chemistry journal article supplement (doi:10.1039/c5cp00216h), 2015-01-01
Supplement: c5cp00216h1.pdf [file c5cp00216h1.pdf]

## ESI for

Marzena Banasiewicz,<sup>a</sup> Irena Deperasińska,<sup>a</sup> Artur Makarewicz,<sup>a</sup> Dikhi Firmansyah,<sup>b</sup> Daniel T. Gryko<sup>b,c,\*</sup> and Bolesław Kozankiewicz<sup>a,\*</sup>, *Why vertically  $\pi$ -expanded imidazo[1,2-*a*]pyridines are weak fluorescence emitters: experimental and computational study.*

Table S1. Calculated electronic transition energies ( $\Delta E$ ) and their oscillator strengths (*f*). Graphical presentations are given on the right side. The lowest energy singlet  $\pi\pi^*$  states are located at 38498  $\text{cm}^{-1}$  and at 38518  $\text{cm}^{-1}$  in compounds **2** and **3**, respectively. All other states are of  $\pi\pi^*$  type.

|                                                                                     |                                 |                       |                                                                                      |                                                                                     |
|-------------------------------------------------------------------------------------|---------------------------------|-----------------------|--------------------------------------------------------------------------------------|-------------------------------------------------------------------------------------|
| 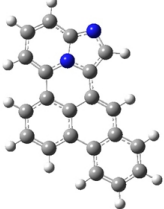  | $\Delta E$ [ $\text{cm}^{-1}$ ] | $\lambda$ [nm]        | <i>f</i>                                                                             |  |
|                                                                                     |                                 | $S_0 \rightarrow S_i$ |                                                                                      |                                                                                     |
|                                                                                     | 21275                           | 470.0                 | 0.1155                                                                               |                                                                                     |
|                                                                                     | 26383                           | 379.0                 | 0.0520                                                                               |                                                                                     |
|                                                                                     | 27125                           | 368.7                 | 0.2836                                                                               |                                                                                     |
|                                                                                     | 32125                           | 311.3                 | 0.0806                                                                               |                                                                                     |
|                                                                                     | 34655                           | 288.6                 | 0.1065                                                                               |                                                                                     |
|                                                                                     | 35377                           | 282.7                 | 0.0394                                                                               |                                                                                     |
|                                                                                     | 35910                           | 278.5                 | 0.0123                                                                               |                                                                                     |
|                                                                                     | 36868                           | 271.2                 | 0.0006                                                                               |                                                                                     |
| 38233                                                                               | 261.6                           | 0.0523                |  |                                                                                     |
| 38498                                                                               | 259.8                           | 0.0004                |                                                                                      |                                                                                     |
|                                                                                     | $S_1 \rightarrow S_0$           |                       |                                                                                      |                                                                                     |
| 16424                                                                               | 608.9                           | 0.0706                |                                                                                      |                                                                                     |
|                                                                                     | $S_0 \rightarrow T_i$           |                       |                                                                                      |                                                                                     |
| 14615                                                                               | 684.2                           |                       |                                                                                      |                                                                                     |
| 18932                                                                               | 528.2                           |                       |                                                                                      |                                                                                     |
| 23455                                                                               | 426.3                           |                       |                                                                                      |                                                                                     |
|                                                                                     |                                 |                       |                                                                                      |                                                                                     |
|                                                                                     |                                 |                       |                                                                                      |                                                                                     |
|  | $\Delta E$ [ $\text{cm}^{-1}$ ] | $\lambda$ [nm]        | <i>f</i>                                                                             |                                                                                     |
|                                                                                     |                                 | $S_0 \rightarrow S_i$ |                                                                                      |                                                                                     |
|                                                                                     | 22036                           | 453.1                 | 0.0233                                                                               |                                                                                     |
|                                                                                     | 26281                           | 380.5                 | 0.0579                                                                               |                                                                                     |
|                                                                                     | 26638                           | 375.4                 | 0.0759                                                                               |                                                                                     |
|                                                                                     | 31536                           | 317.1                 | 0.1029                                                                               |                                                                                     |
|                                                                                     | 34462                           | 290.2                 | 0.0822                                                                               |                                                                                     |
|                                                                                     | 35710                           | 280.0                 | 0.0080                                                                               |                                                                                     |
|                                                                                     | 35856                           | 278.9                 | 0.0059                                                                               |                                                                                     |
|                                                                                     | 36688                           | 272.6                 | 0.0278                                                                               |                                                                                     |
| 38518                                                                               | 259.6                           | 0.0003                |                                                                                      |                                                                                     |
| 38544                                                                               | 259.4                           | 0.1606                |                                                                                      |                                                                                     |
|                                                                                     | $S_1 \rightarrow S_0$           |                       |                                                                                      |                                                                                     |
| 18253                                                                               | 547.9                           | 0.1747                |                                                                                      |                                                                                     |
|                                                                                     | $S_0 \rightarrow T_i$           |                       |                                                                                      |                                                                                     |
| 14149                                                                               | 706.8                           |                       |                                                                                      |                                                                                     |
| 19736                                                                               | 506.7                           |                       |                                                                                      |                                                                                     |
| 22994                                                                               | 434.9                           |                       |                                                                                      |                                                                                     |

Table S2. Comparison of shapes of HOMO and LUMO orbitals of both isomers and the directions of their dipole moments

|                                                                                    | HOMO                                                                               | LUMO                                                                               | dipole moment                                                                        |
|------------------------------------------------------------------------------------|------------------------------------------------------------------------------------|------------------------------------------------------------------------------------|--------------------------------------------------------------------------------------|
| 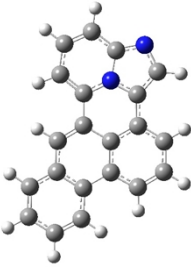  |   |   |   |
|  |  |  |  |

Table S3. Frequencies of vibrations calculated for optimized structures of compounds **2** and **3** in  $S_0$  and  $S_1$  electronic states. Vibrations active in the fluorescence spectra indicated in bold.

| compound         | <b>2</b>     |       | <b>3</b>     |       | compound         | <b>2</b>      |        | <b>3</b>      |        |
|------------------|--------------|-------|--------------|-------|------------------|---------------|--------|---------------|--------|
| electronic state | $S_0$        | $S_1$ | $S_0$        | $S_1$ | electronic state | $S_0$         | $S_1$  | $S_0$         | $S_1$  |
| mode number      |              |       |              |       | mode number      |               |        |               |        |
| 1                | 44.5         | 45.0  | 48.5         | 53.8  | 51               | 1059.5        | 1053.6 | 1056.1        | 1043.2 |
| 2                | 63.4         | 69.3  | 62.4         | 63.1  | 52               | 1070.1        | 1064.9 | 1065.1        | 1054.9 |
| 3                | 106.9        | 101.8 | 109.9        | 103.4 | 53               | 1082.7        | 1071.3 | 1082.6        | 1067.0 |
| 4                | 127.1        | 123.7 | 130.4        | 129.8 | 54               | 1100.4        | 1084.9 | <b>1093.5</b> | 1080.4 |
| <b>5</b>         | <b>178.4</b> | 175.6 | <b>179.1</b> | 176.1 | 55               | 1130.9        | 1120.4 | 1120.1        | 1114.2 |
| 6                | 208.1        | 188.6 | 209.7        | 193.7 | 56               | 1149.1        | 1138.5 | 1159.7        | 1154.0 |
| 7                | 224.3        | 203.3 | 224.4        | 213.6 | 57               | 1174.2        | 1169.3 | 1181.3        | 1175.9 |
| 8                | 257.8        | 256.9 | 255.0        | 250.2 | 58               | 1192.1        | 1186.3 | 1188.3        | 1184.4 |
| 9                | 293.0        | 287.8 | 294.5        | 290.7 | 59               | 1195.8        | 1189.8 | 1193.7        | 1187.8 |
| <b>10</b>        | <b>299.8</b> | 294.5 | 308.5        | 295.1 | 60               | 1213.6        | 1202.7 | 1209.1        | 1189.9 |
| 11               | 310.0        | 310.4 | <b>318.8</b> | 318.9 | 61               | 1229.6        | 1224.6 | 1224.0        | 1220.5 |
| 12               | 341.4        | 336.3 | 329.8        | 326.0 | 62               | 1236.1        | 1226.7 | 1245.6        | 1233.8 |
| <b>13</b>        | <b>362.6</b> | 360.3 | <b>357.2</b> | 357.2 | 63               | 1245.8        | 1265.5 | <b>1249.6</b> | 1246.6 |
| 14               | 450.7        | 424.1 | 439.0        | 421.9 | 64               | 1290.2        | 1274.9 | 1280.1        | 1279.7 |
| 15               | 459.5        | 446.3 | 441.7        | 435.4 | 65               | <b>1308.0</b> | 1292.8 | 1310.1        | 1291.9 |
| 16               | 472.7        | 456.8 | 492.4        | 457.3 | 66               | 1320.0        | 1306.9 | 1331.4        | 1309.0 |
| 17               | 498.2        | 489.5 | <b>506.2</b> | 473.7 | <b>67</b>        | <b>1335.0</b> | 1321.6 | <b>1334.8</b> | 1321.3 |
| 18               | 511.4        | 495.4 | 515.5        | 500.3 | 68               | 1362.9        | 1349.9 | 1363.4        | 1357.8 |
| 19               | 513.7        | 505.3 | 529.5        | 507.4 | 69               | 1364.9        | 1369.5 | 1364.3        | 1370.4 |
| 20               | 538.0        | 507.8 | 530.2        | 524.6 | 70               | 1368.8        | 1374.3 | 1372.1        | 1376.4 |
| 21               | 579.1        | 566.7 | 573.6        | 561.0 | 71               | 1386.9        | 1380.2 | 1388.9        | 1387.7 |
| 22               | 593.8        | 570.6 | 586.8        | 561.0 | 72               | 1393.1        | 1417.1 | 1396.2        | 1402.0 |
| 23               | 595.0        | 591.8 | 597.4        | 580.0 | 73               | 1423.1        | 1421.4 | <b>1412.8</b> | 1413.9 |
| 24               | 611.2        | 597.8 | 607.0        | 592.2 | 74               | 1431.8        | 1437.7 | 1434.2        | 1440.7 |
| 25               | 627.4        | 617.8 | 645.1        | 633.2 | 75               | 1469.7        | 1455.1 | 1471.3        | 1451.8 |
| 26               | 653.5        | 635.7 | 659.1        | 638.7 | 76               | 1480.4        | 1467.6 | 1482.5        | 1462.4 |
| 27               | 664.4        | 643.7 | 666.2        | 646.6 | 77               | 1500.0        | 1485.8 | 1494.9        | 1485.6 |
| 28               | 672.6        | 657.0 | 669.5        | 659.0 | <b>78</b>        | <b>1532.7</b> | 1511.0 | <b>1529.1</b> | 1500.1 |
| 29               | 679.2        | 671.1 | 681.7        | 664.8 | <b>79</b>        | <b>1543.1</b> | 1528.6 | <b>1541.6</b> | 1515.7 |
| 30               | 743.8        | 696.8 | 740.8        | 693.0 | 80               | 1560.5        | 1535.8 | 1569.9        | 1527.0 |
| 31               | 752.9        | 701.6 | 752.4        | 718.1 | <b>81</b>        | <b>1572.3</b> | 1553.4 | <b>1572.6</b> | 1548.8 |
| 32               | 756.1        | 730.2 | 755.3        | 736.9 | 82               | 1586.9        | 1578.6 | 1585.3        | 1571.1 |
| 33               | 767.4        | 751.3 | 759.7        | 742.7 | 83               | 1623.4        | 1588.4 | 1625.1        | 1585.9 |
| 34               | 770.5        | 760.4 | 770.7        | 743.3 | 84               | 1644.8        | 1606.6 | 1647.8        | 1603.7 |
| 35               | 791.0        | 764.6 | 791.6        | 753.7 | <b>85</b>        | <b>1661.4</b> | 1632.7 | <b>1651.5</b> | 1612.7 |
| 36               | 795.8        | 773.0 | 804.6        | 762.9 | <b>86</b>        | <b>1663.6</b> | 1643.2 | <b>1664.9</b> | 1638.0 |
| 37               | 821.8        | 785.2 | 822.6        | 795.1 | 87               | 1675.9        | 1652.1 | 1677.0        | 1664.4 |
| <b>38</b>        | <b>856.0</b> | 789.0 | <b>835.4</b> | 799.0 | 88               | 3177.7        | 3181.3 | 3177.3        | 3176.1 |
| 39               | 857.5        | 814.5 | 855.3        | 827.2 | 89               | 3187.0        | 3183.7 | 3187.3        | 3188.4 |
| 40               | 865.6        | 830.8 | 871.7        | 831.6 | 90               | 3189.4        | 3191.5 | 3188.9        | 3191.2 |
| 41               | 871.3        | 853.8 | 879.0        | 847.8 | 91               | 3191.9        | 3194.2 | 3197.0        | 3193.4 |
| 42               | 879.3        | 857.0 | 885.8        | 872.9 | 92               | 3201.9        | 3199.5 | 3203.0        | 3195.9 |
| 43               | 889.3        | 864.2 | 887.8        | 880.9 | 93               | 3204.2        | 3207.9 | 3203.8        | 3198.4 |
| 44               | 897.9        | 878.0 | 893.7        | 888.4 | 94               | 3211.2        | 3210.0 | 3205.5        | 3210.2 |
| 45               | 935.9        | 929.9 | 929.4        | 917.5 | 95               | 3214.9        | 3221.5 | 3213.8        | 3214.2 |

|    |       |       |       |       |    |        |        |        |        |
|----|-------|-------|-------|-------|----|--------|--------|--------|--------|
| 46 | 943.5 | 949.5 | 947.7 | 929.0 | 96 | 3228.9 | 3235.2 | 3229.4 | 3234.2 |
| 47 | 969.1 | 953.0 | 970.7 | 951.8 | 97 | 3235.5 | 3236.8 | 3235.7 | 3236.0 |
| 48 | 970.7 | 961.6 | 972.3 | 965.1 | 98 | 3239.8 | 3237.9 | 3239.5 | 3242.3 |
| 49 | 972.4 | 961.9 | 988.0 | 980.4 | 99 | 3248.5 | 3258.4 | 3247.2 | 3258.7 |
| 50 | 986.0 | 987.6 | 994.2 | 991.7 |    |        |        |        |        |

Table S4. Graphical presentation of vibrations "170", "360", "1530" and "1540"  $\text{cm}^{-1}$  of both molecules

|        |                                                                                     |                                                                                      |
|--------|-------------------------------------------------------------------------------------|--------------------------------------------------------------------------------------|
|        | 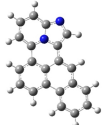   |   |
| "170"  |    |    |
| "360"  |   |   |
| "1530" |  |  |
| "1540" |  |  |

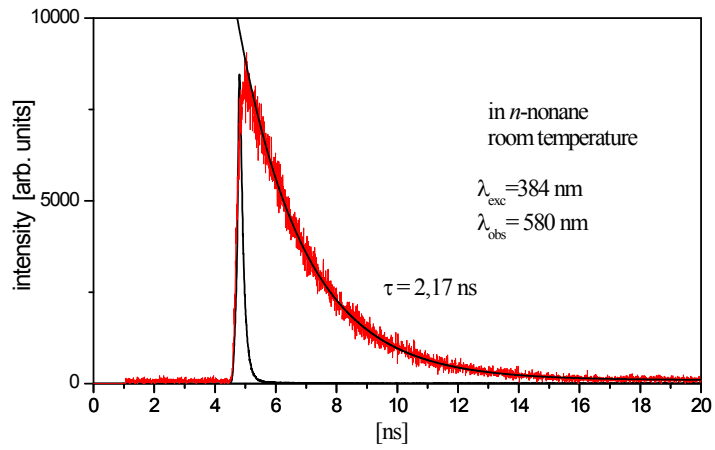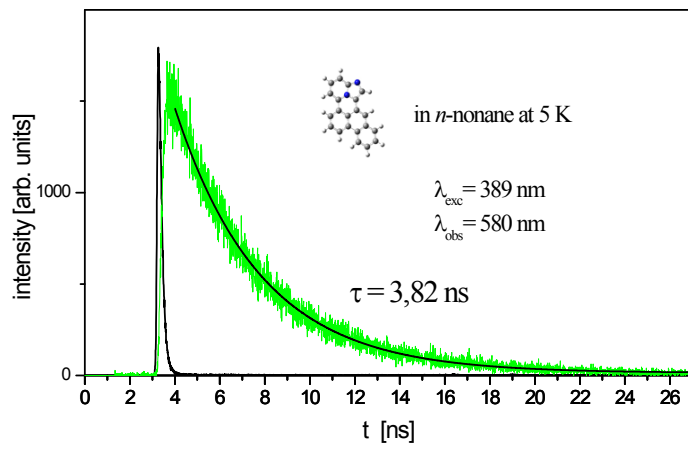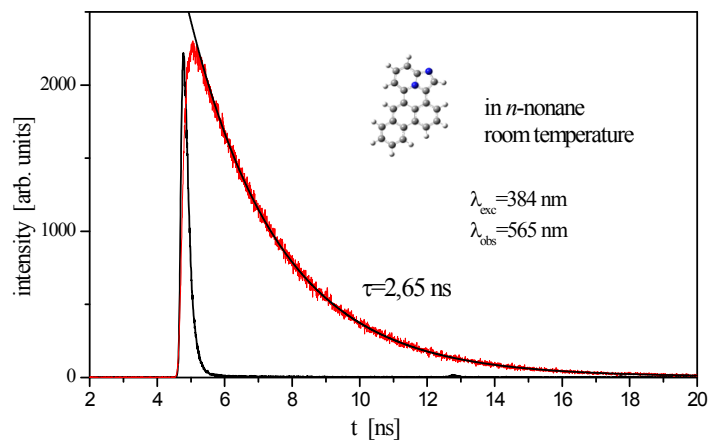

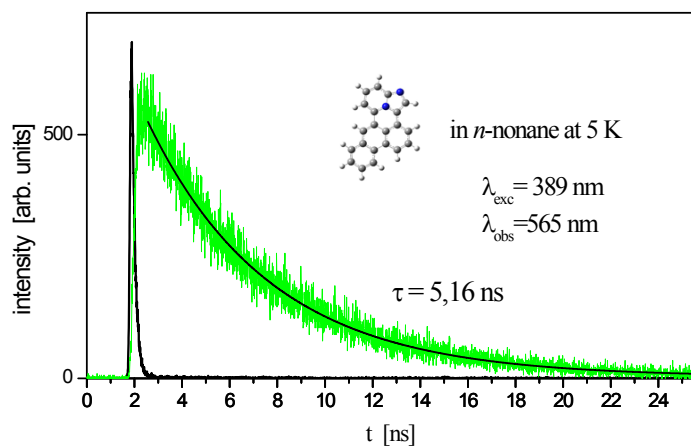

Figure S1. Fluorescence decays of compounds **2** and **3** in *n*-nonane at room temperature (red lines) and at 5 K (green lines). Excitation pulses are given as solid black lines. Fits to the single exponential dependences.

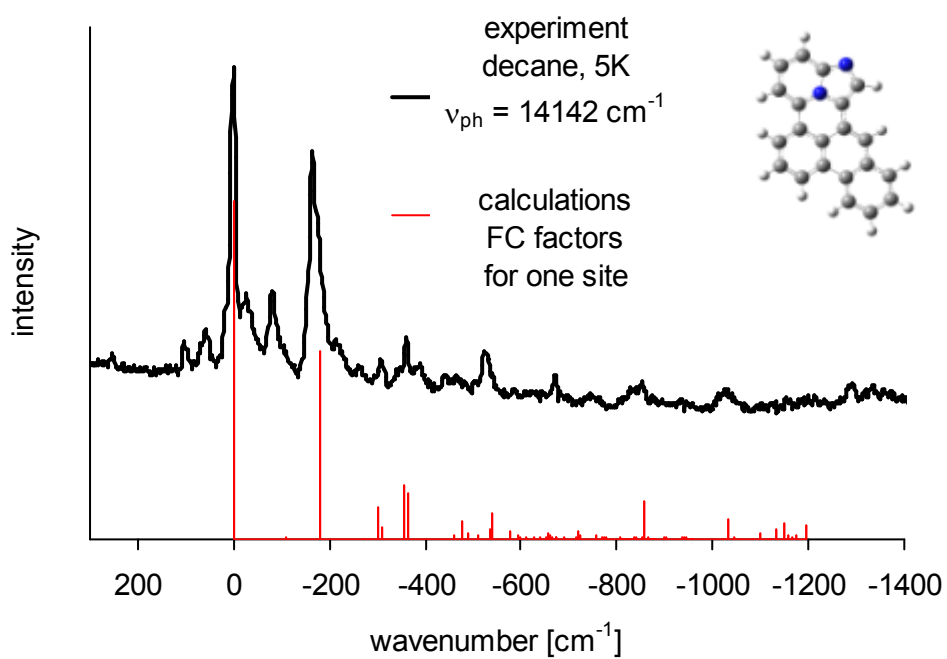

Figure S2. Phosphorescence spectrum of compound **2** in *n*-decane at 5 K, and the calculated Franck-Condon factors (for a single site).

## References

Gaussian 09, Revision B.01, Frisch, M.J.; Trucks, G.W.; Schlegel, H.B.; Scuseria, G.E.; Robb, M.A.; Cheeseman, J.R.; Scalmani, G.; Barone, V.; Mennucci, B.; Petersson, G.A.; Nakatsuji, H.; Caricato, M.; Li, X.; Hratchian, H.P.; Izmaylov, A.F.; Bloino, J.; Zheng, G.; Sonnenberg, J.L.; Hada, M.; Ehara, M.; Toyota, K.; Fukuda, R.; Hasegawa, J.; Ishida, M.; Nakajima, T.; Honda, Y.; Kitao, O.; Nakai, H.; Vreven, T.; Montgomery Jr., J.A.; Peralta, J.E.; Ogliaro, F.; Bearpark, M.; Heyd, J.J.; Brothers, E.; Kudin, K.N.; Staroverov, V.N.; Keith, T.; Kobayashi, R.; Normand, J.; Raghavachari, K.; Rendell, A.; Burant, J.C.; Iyengar, S.S.; Tomasi, J.; Cossi, M.; Rega, N.; Millam, J.M.; Klene, M.; Knox, J.E.; Cross, J.B.; Bakken, V.; Adamo, C.; Jaramillo, J.; Gomperts, R.; Stratmann, R.E.; Yazyev, O.; Austin, A.J.; Cammi, R.; Pomelli, C.; Ochterski, J.W.; Martin, R.L.; Morokuma, K.; Zakrzewski, V.G.; Voth, G.A.; Salvador, P.; Dannenberg, J.J.; Dapprich, S.; Daniels, A.D.; Farkas, O.; Foresman, J.B.; Ortiz, J.V.; Cioslowski, J.; Fox, D.J.; Gaussian Inc., Wallingford CT, **2010**.
